# Supplementary material
Source: Springer Nature journal article supplement (http://www.springermedizin.de/resource/supplementary/12943_2013_1141_MOESM2_ESM.pdf/9552590)
Supplement: MOESM2 [file 9552590]

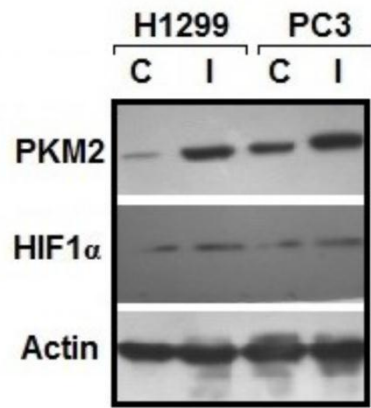

**Fig S2.** Insulin up-regulated PKM2 expression in H1299 and PC3 cells. (*C= Control, I= 100 nM insulin*).
